# Supplementary material
Source: PubMed Central journal article supplement (PMC8606261)
Supplement: NIHMS1745438-supplement-Figure_S3.pdf [file NIHMS1745438-supplement-Figure_S3.pdf]

## Supplemental Figure S3

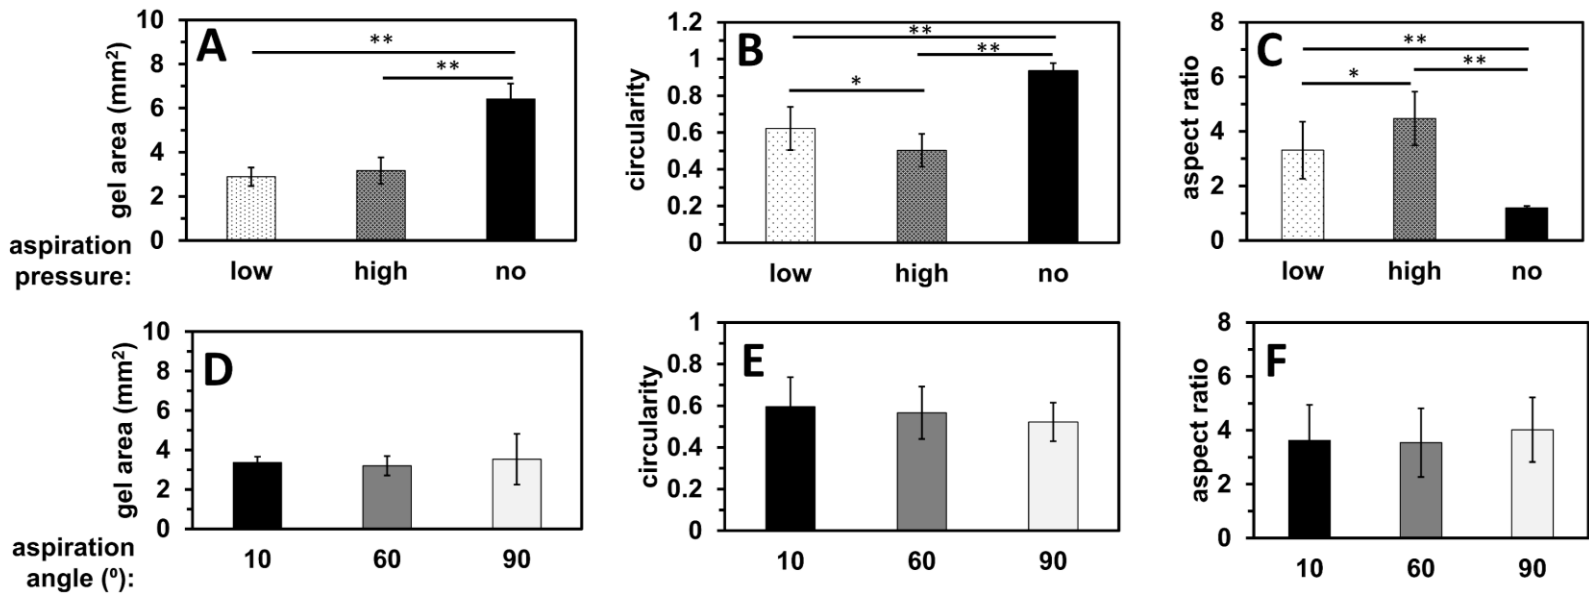

**Figure S3.** Effects of aspiration pressure protocol on (A) gel area, (B) circularity, and (C) aspect ratio. Similarly, effects of aspiration pipette angle with the disk plane for (D) gel area, (E) circularity, and (F) aspect ratio.
